# Supplementary material
Source: PubMed Central journal article supplement (PMC4002225)
Supplement: NIHMS564855-supplement-Supplementary_Figures_1-6_and_Table_1.pdf [file NIHMS564855-supplement-Supplementary_Figures_1-6_and_Table_1.pdf]

# Supplemental Figures and Tables

## Somatic mutations of the Parkinson's Disease gene *PARK2* in glioblastoma and other human malignancies

Selvaraju Veeriah<sup>1\*</sup>, Barry S. Taylor<sup>2\*</sup>, Shasha Meng<sup>1\*</sup>, Fang Fang<sup>1</sup>, Emrullah Yilmaz<sup>1</sup>, Igor Vivanco<sup>1</sup>, Manickam Janakiraman<sup>1</sup>, Nikolaus Schultz<sup>2</sup>, Aphrothiti J. Hanrahan<sup>1</sup>, William Pao<sup>1,3</sup>, Marc Ladanyi<sup>1,4</sup>, Chris Sander<sup>2</sup>, Adriana Heguy<sup>1</sup>, Eric C. Holland<sup>5</sup>, Philip B. Paty<sup>6</sup>, Paul S. Mischel<sup>8</sup>, Linda Liaw<sup>8</sup>, Timothy F. Cloughesy<sup>8</sup>, Ingo K. Mellinghoff<sup>1,9</sup>, David B. Solit<sup>1,3</sup>, and Timothy A. Chan<sup>1, 10</sup>

<sup>1</sup>Human Oncology and Pathogenesis Program, Memorial Sloan-Kettering Cancer Center, 1275 York Avenue, New York, New York, 10065, USA.

<sup>2</sup>Computational Biology Center, Memorial Sloan-Kettering Cancer Center, New York, New York, 10065, USA.

Departments of <sup>3</sup>Medicine, <sup>4</sup>Pathology, <sup>5</sup>Neurosurgery, <sup>6</sup>Surgery, <sup>9</sup>Neurology, <sup>10</sup>Radiation Oncology, Memorial Sloan Kettering Cancer Center, New York, New York 10065, USA.

<sup>8</sup>David Geffen School of Medicine, University of California, Los Angeles, CA 90095.

# Veeriah Supplemental Fig. 1

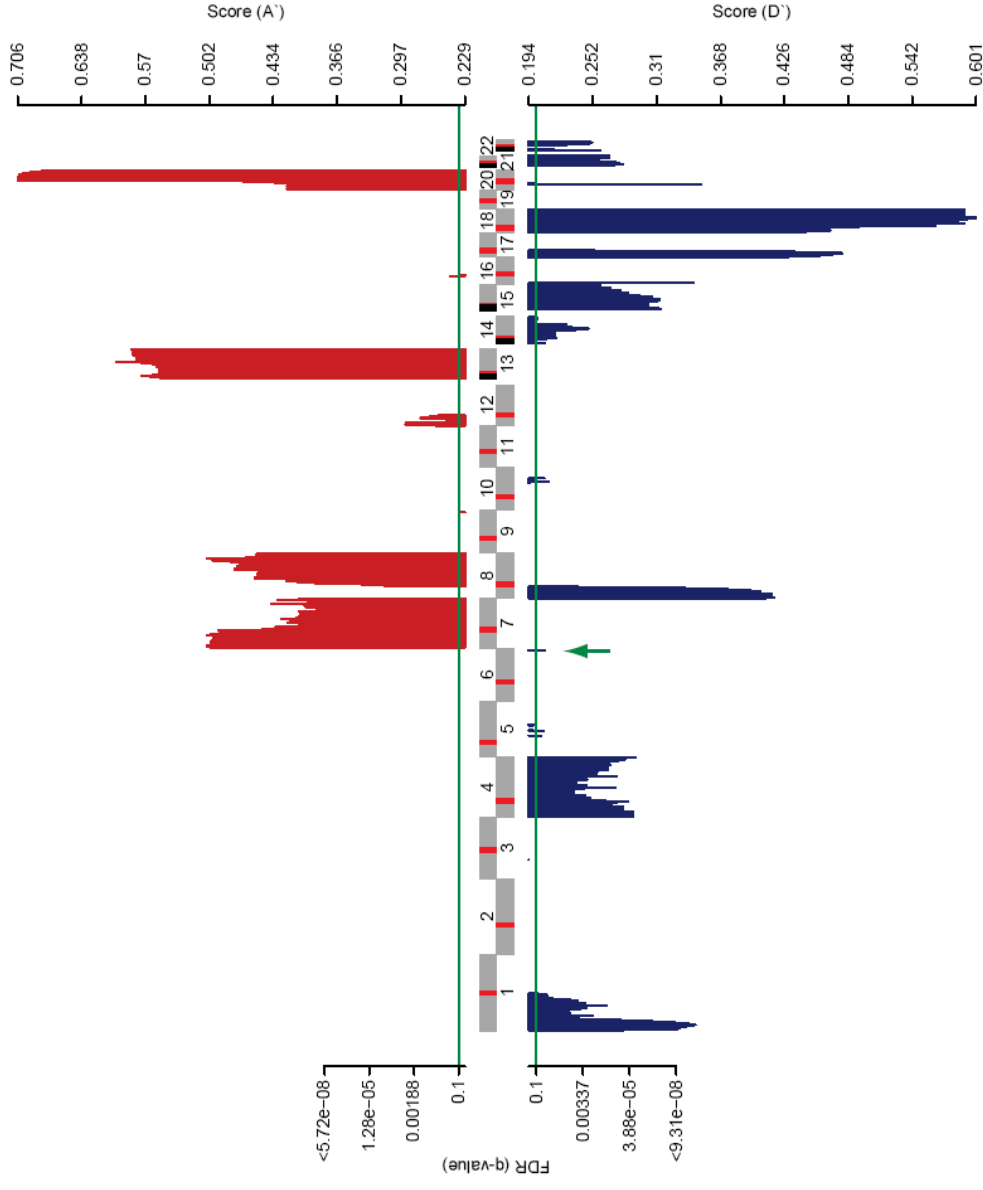

**Supplemental Figure 1.** Statistically significant genome-wide copy number aberrations in colon cancer. Amplifications (red) and deletions (blue) are indicated across the 22 autosomes in genomic coordinates (center; green line, FDR<10% left axis). Analysis and scores were calculated by RAE as described in Methods. The green arrow indicates the discrete region of significance that spans *PARK2*.

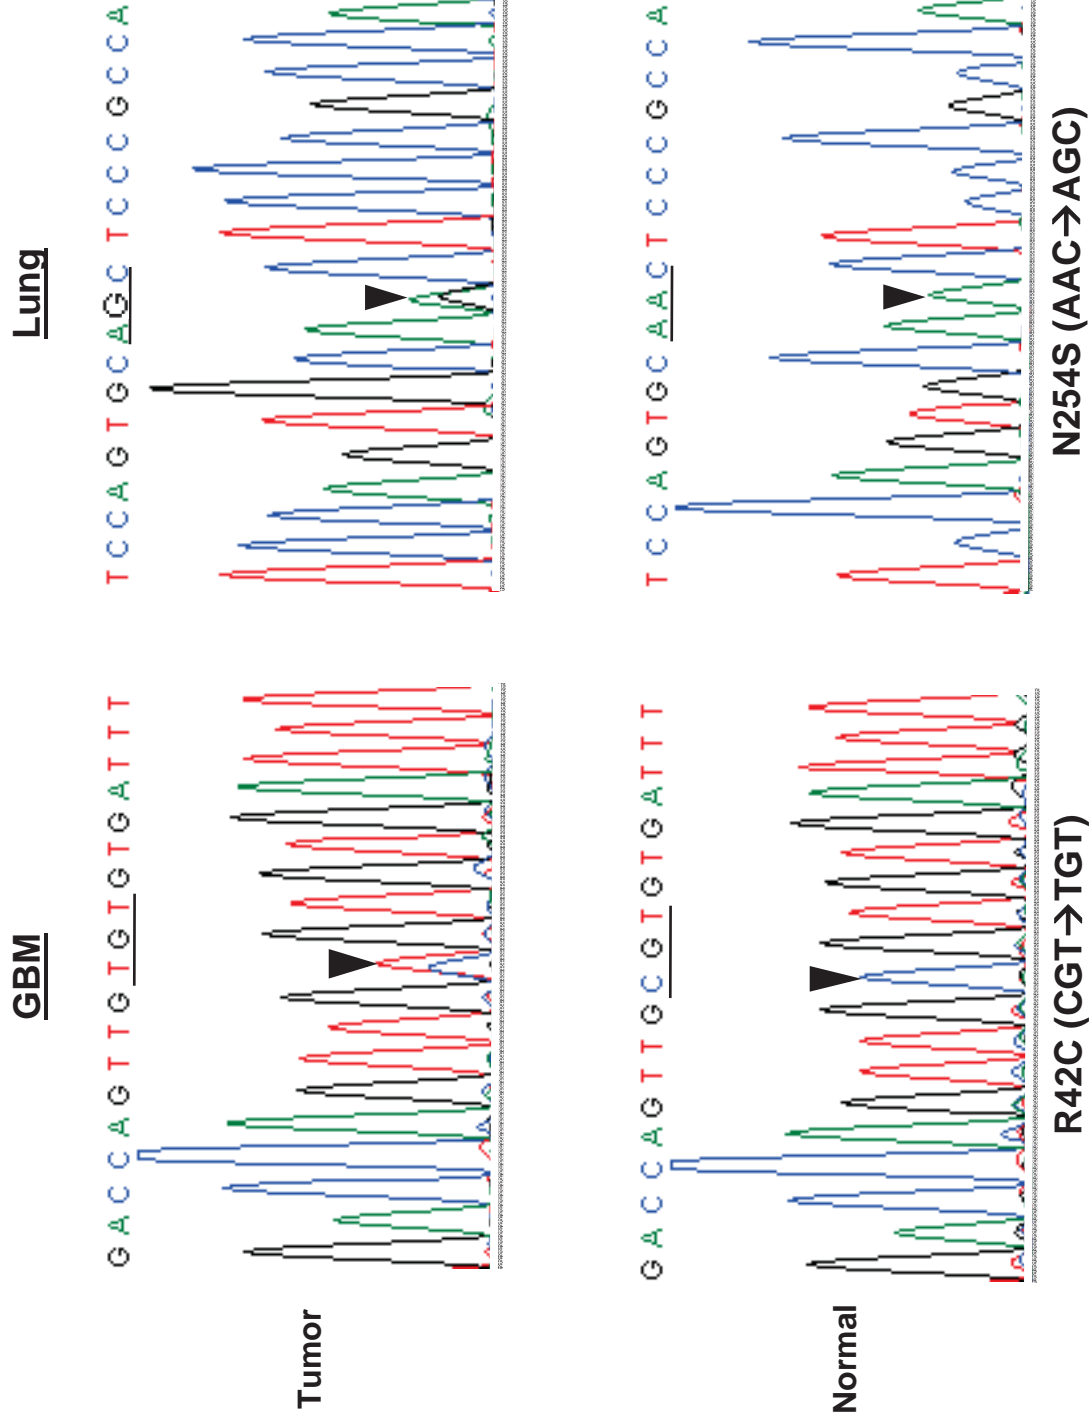

**Supplemental Figure 2.** Sequencing traces of representative tumors with *PARK2* mutations. Arrows point to sites of mutation.

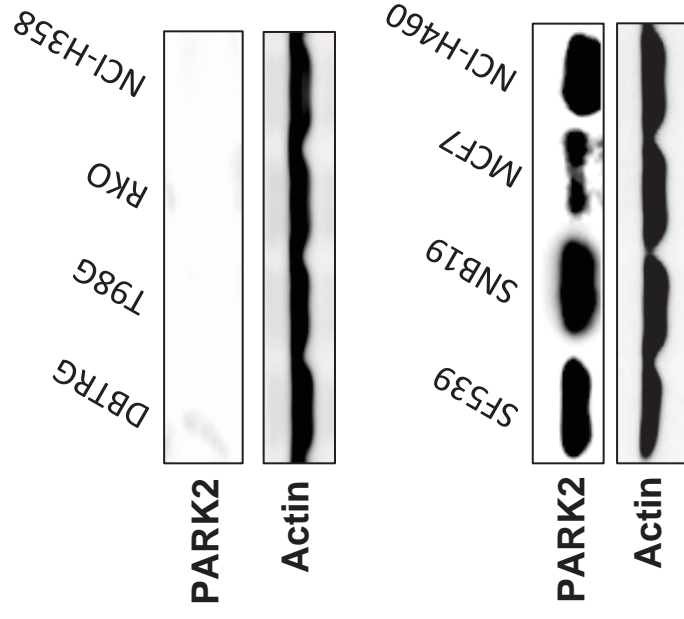

**Supplemental Figure 3.** PARK2 protein expression in human cancer cell lines. Western blot analysis of human cancer cell lines using anti-PARK2 antibody. Actin is used as a loading control. Equal amounts of protein (5ug) were loaded in all lanes.

a

PARK2 (-) expression cell lines

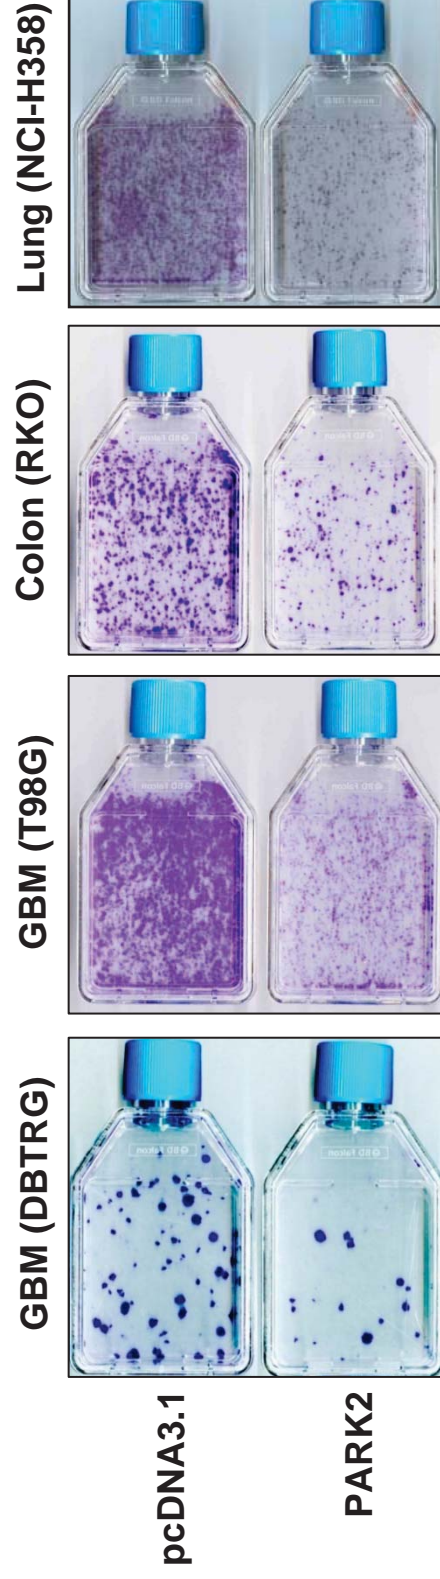

b

**PARK2 (+) expression cell lines**

---

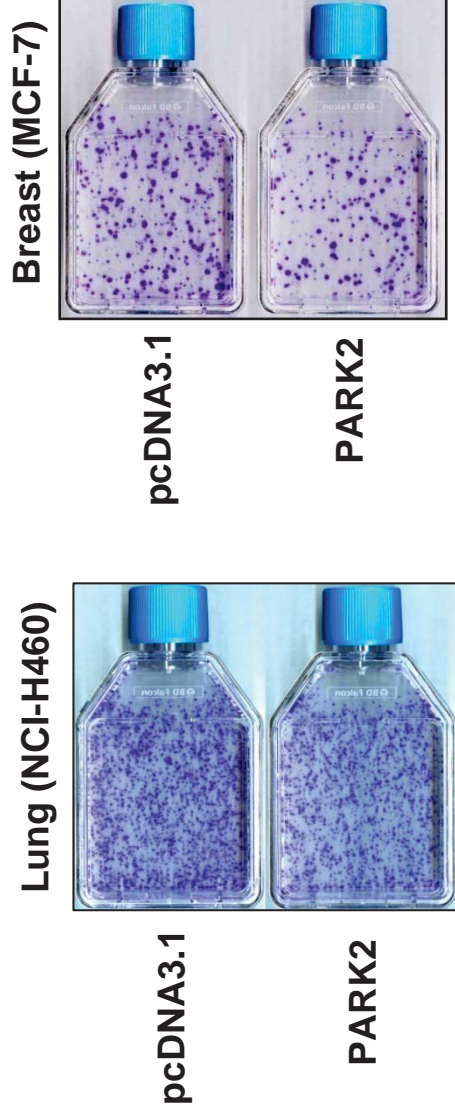

C

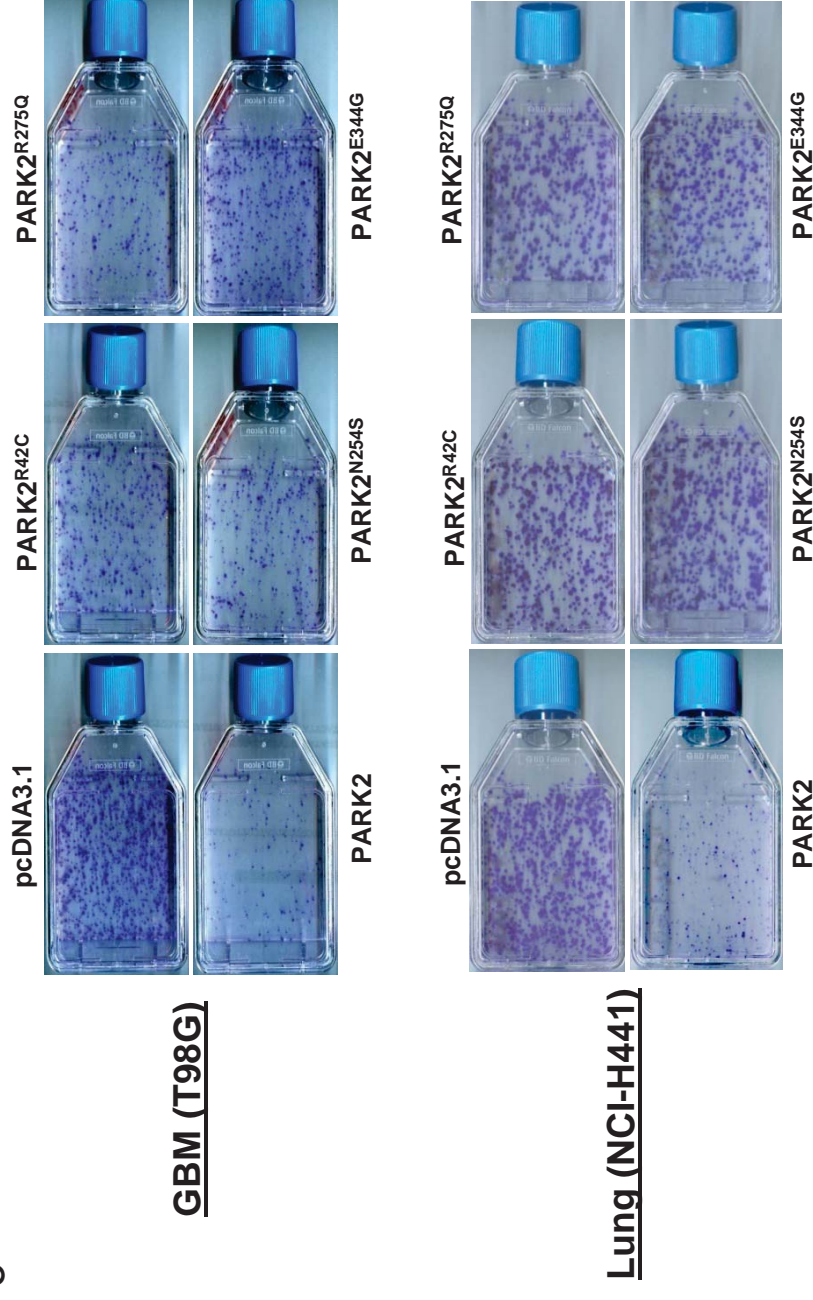

**Supplemental Figure 4.** Growth suppressive effects of wild-type and mutant PARK2. Quantitation of results in Fig. 3. **(a)** Colony formation assays demonstrating that wild-type PARK2 suppresses cell growth in cells lacking PARK2 protein. Representative flasks are shown for vector-only control (pcDNA3.1) and vector + PARK2 cDNA (PARK2). **(b)** Colony formation assays demonstrating that wild-type PARK2 does not significantly suppress growth in cell lines with normal PARK2 protein expression. Representative flasks are shown for vector-only control (pcDNA3.1) and vector + PARK2 cDNA (PARK2). **(c)** Colony formation assays demonstrating that cancer-specific mutations in PARK2 compromise its growth suppressive ability. Representative flasks are shown for vector-only control (pcDNA3.1) and vector + PARK2 cDNA (PARK2).



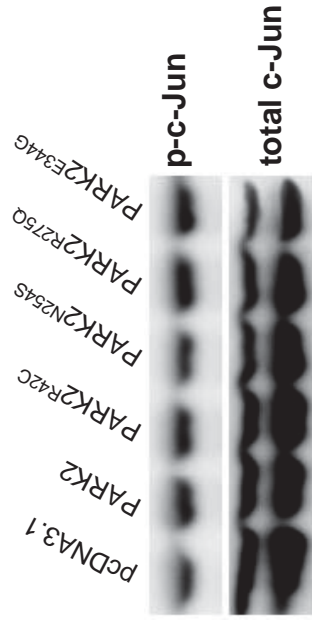

**Supplemental Figure 5.** Expression of wt or mutant PARK2 does not alter c-Jun phosphorylation. T98G cells were stably transfected with the vector alone (pcDNA3.1) or the indicated PARK2 cDNAs. All proteins were expressed (see main text). Western blot detection was performed using antibody specific for phospho-c-Jun or total c-Jun.

## Familial Parkinson's Disease

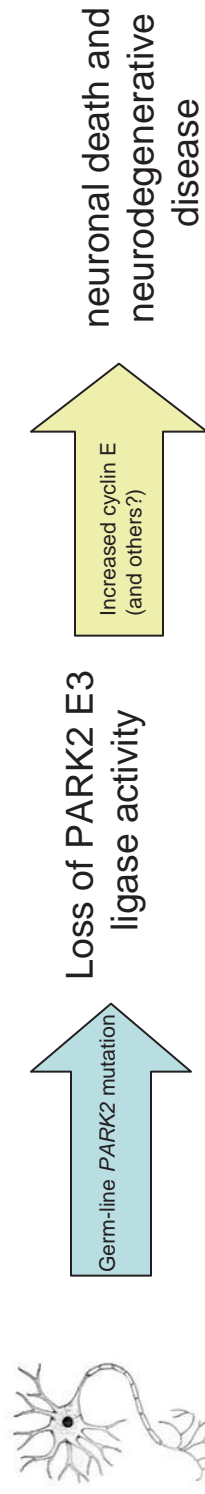

neuron

## Cancer

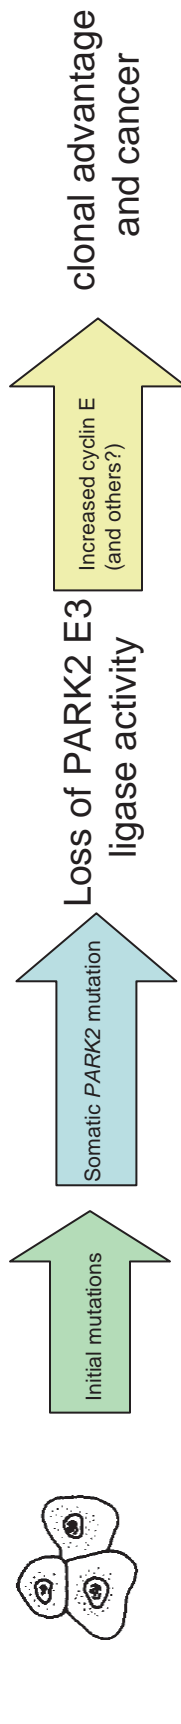

dividing somatic cell  
(ie. astrocytes,  
colon epithelial cells)

**Supplemental Figure 6.** Model of differential effects of *PARK2* mutation in Parkinson's Disease and cancer.

**Supplemental Table 1. Frequencies of Mutations**

| Cancer type      | Total samples with alterations | Total samples analyzed | Frequency |
|------------------|--------------------------------|------------------------|-----------|
| <b>Mutations</b> |                                |                        |           |
| Glioblastoma     | 7                              | 75                     | 9.3%      |
| Lung             | 4                              | 61                     | 6.5%      |
| Squamous, H/N    | 0                              | 24                     | 0%        |
| Colon            | 1                              | 82                     | 1.2%      |
| Total            |                                | 242                    |           |

## **Supplementary note for clinical samples**

Glioma aCGH samples analyzed were from the tumors procured by The Cancer Genome Atlas (TCGA) as described above. Informed consent was obtained by the member institutions of the TCGA. The glioma, lung, and colon samples analyzed were from the Memorial Sloan Kettering Cancer Center and the University of California, Los Angeles. All samples were obtained following informed consent and in full accordance with the Institutional Review Board of each institution.
